# Supplementary material for: Carbon Stocks and Fluxes in Tropical Lowland Dipterocarp Rainforests in Sabah, Malaysian Borneo
Source: PubMed Central journal article supplement (PMC3250468; doi:10.1371/journal.pone.0029642), 2012-01-03

Figure S1 A generalized additive model (GAM) with 3df regression spline (y-axis) term was fit to show the 3rd degree (cubic) relationship between litterfall and mean rainfall.

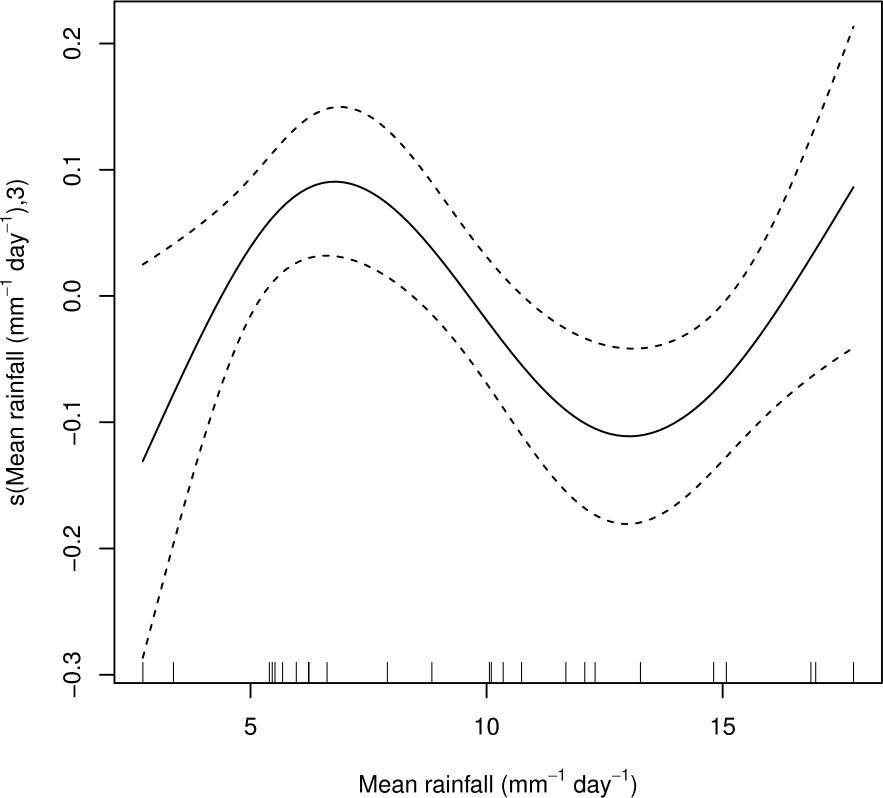

Supplement: pone.0029642.s001.pdf [file pone.0029642.s001.pdf]
